# Supplementary material for: Evolution of the reaction mechanism during the MTH induction period over the 2-dimensional FER zeolite
Source: Royal Society of Chemistry journal article supplement (doi:10.1039/c6ra09237c), 2016-01-01
Supplement: c6ra09237c1.pdf [file c6ra09237c1.pdf]

# Evolution of Reaction Mechanism During MTH Induction Period over the 2-Dimensional FER Zeolite

*Liang Qi<sup>ac</sup>, Jinzhe Li<sup>a</sup>, Lei Xu<sup>\*a</sup> and Zhongmin Liu<sup>\*a</sup>*

<sup>a</sup>National Engineering Laboratory for Methanol to Olefins, Dalian National Laboratory for Clean Energy, iChEM (Collaborative Innovation Center of Chemistry for Energy Materials), Dalian Institute of Chemical Physics, Chinese Academy of Sciences, Dalian 116023, People's Republic of China;

<sup>b</sup>Dalian National Laboratory for Clean Energy, Dalian Institute of Chemical Physics, Chinese Academy of Sciences, Dalian 116023, P. R. China

<sup>c</sup>University of Chinese Academy of Sciences, Beijing 100049, People's Republic of China

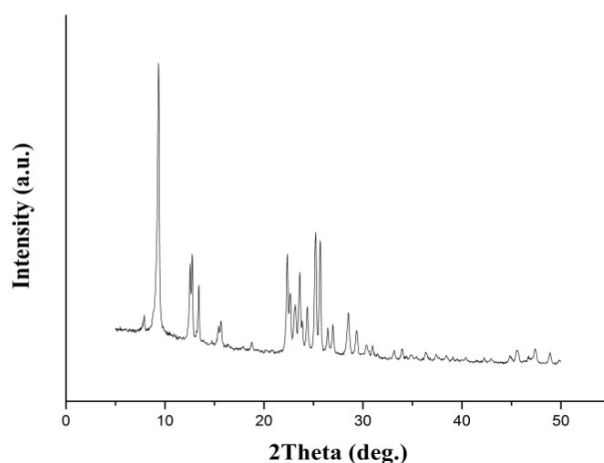

**Figure S1.** XRD pattern of the HZSM-35 sample.

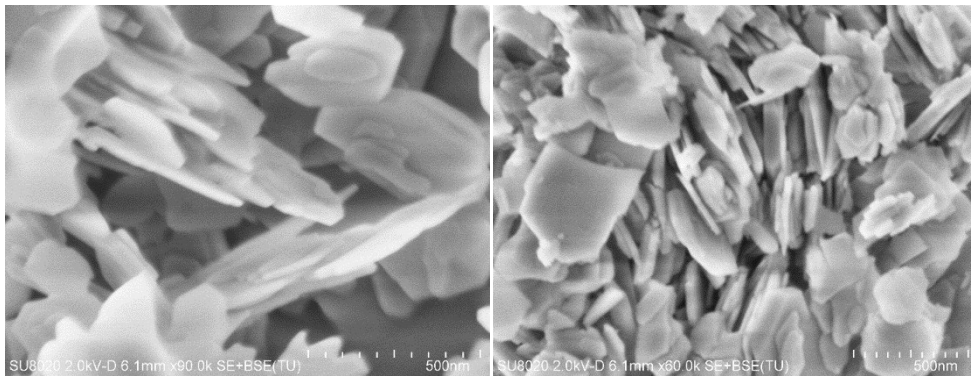

**Figure S2.** SEM images of the HZSM-35 sample.

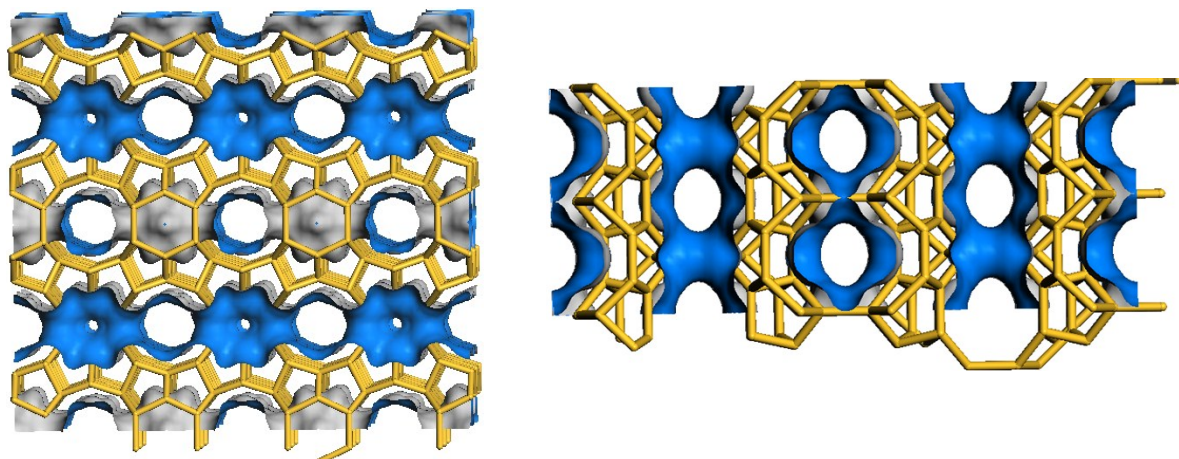

**Figure S3.** The skeletal structure of HZSM-35.
